# Supplementary material for: Towards the characterization of the hidden world of small proteins in Staphylococcus aureus, a proteogenomics approach
Source: PLoS Genet. 2021 Jun 1;17(6):e1009585. doi: 10.1371/journal.pgen.1009585 (PMC8195425; doi:10.1371/journal.pgen.1009585)
Supplement: S5 Table — (XLSX) [file pgen.1009585.s005.xlsx]

## Sheet: Zusammenfassung
S4 Table. SP100 in Staphylococcus aureus Newman identified with one unique peptide
			trypsin			LysC	AspN
			gel-based Fusion MS	gel-based Velos Pro MS	gel-free Velos Pro MS	gel-based Velos Pro MS	gel-based Velos Pro MS
sORF	start	end	MS/MS counts	MS/MS counts	MS/MS counts	MS/MS counts	MS/MS counts
sORFSaNew0004	2732539	2732261	1	4	4	0	0
sORFSaNew0008	1593859	1593948	2	1	0	0	0
sORFSaNew0009	337157	337330	0	16	156	350	0
sORFSaNew0012	2465328	2465414	19	0	2	0	0
sORFSaNew0013	961008	960949	5	0	5	0	0
sORFSaNew0019	1709395	1709135	7	14	9	8	0
sORFSaNew0020	1467560	1467339	0	0	0	4	0
sORFSaNew0024	1215931	1215969	0	0	2	0	0
sORFSaNew0025	1739851	1739651	0	4	20	107	0
sORFSaNew0026	1406066	1405881	0	0	6	0	57
sORFSaNew0027	2778757	2778653	22	98	385	602	0
sORFSaNew0031	860790	860993	3	4	6	0	0
sORFSaNew0033	2017609	2017839	34	29	14	12	0
sORFSaNew0036	861226	860990	2	0	3	0	0
sORFSaNew0037	1346001	1346207	0	0	0	0	8
sORFSaNew0043	897950	898129	0	0	0	0	6
sORFSaNew0046	897528	897764	0	1	2	0	0
sORFSaNew0055	2008771	2008523	15	2	10	0	0
sORFSaNew0056	1082525	1082358	2	0	0	0	0
sORFSaNew0057	1243119	1242931	11	0	9	0	0
sORFSaNew0060	2592388	2592131	7	1	58	0	0
sORFSaNew0061	408073	408102	19	0	2	0	0
sORFSaNew0062	334227	334421	5	0	5	0	0
sORFSaNew0066	279745	279987	5	1	4	0	0
sORFSaNew0072	1947658	1947506	14	28	0	0	0
sORFSaNew0073	466443	466375	0	0	0	2	0
sORFSaNew0074	2205744	2205809	0	0	2	0	0
sORFSaNew0077	1205046	1205336	0	2	4	0	0
sORFSaNew0081	2117523	2117272	4	1	9	0	0
sORFSaNew0084	2383965	2384129	0	0	2	0	0
sORFSaNew0085	1104047	1103817	14	10	6	15	0
sORFSaNew0088	1446714	1446983	0	0	5	0	0
sORFSaNew0097	1338596	1338829	28	0	1	0	0
sORFSaNew0099	2535530	2535279	3	8	8	0	0
sORFSaNew0101	1474097	1473903	2	0	0	0	0
sORFSaNew0104	2590516	2590466	0	2	0	0	0
sORFSaNew0114	1083150	1083425	31	70	26	0	0
sORFSaNew0116	2130379	2130561	105	53	78	0	0
sORFSaNew0117	1350166	1350303	0	0	2	0	0
sORFSaNew0120	464277	464372	0	0	2	0	0
sORFSaNew0122	335141	335389	1	0	15	0	0
sORFSaNew0126	1112442	1112636	5	0	5	0	0
sORFSaNew0127	2870223	2870255	19	0	2	0	0
sORFSaNew0129	1979860	1979699	7	1	58	0	0
sORFSaNew0133	2160049	2159825	0	0	0	0	12
sORFSaNew0136	2060631	2060458	2	0	0	0	0
sORFSaNew0138	2009685	2009491	5	0	5	0	0
sORFSaNew0144	2151285	2151151	0	0	0	2	0
sORFSaNew0157	1113356	1113604	0	0	12	0	0
sORFSaNew0159	1349378	1349626	0	0	0	0	4
sORFSaNew0161	2027320	2027595	2	0	4	0	0
sORFSaNew0162	1223523	1223735	0	0	2	0	0
sORFSaNew0172	1862909	1862712	2	0	1	0	0
sORFSaNew0173	2735184	2735459	2	0	0	0	0
sORFSaNew0177	115767	115844	0	0	0	3	0
